# Supplementary material
Source: PubMed Central journal article supplement (PMC6626318)
Supplement: NIHMS1018626-supplement-1.pdf [file NIHMS1018626-supplement-1.pdf]

**Supplemental Table 1.** Demographic Characteristics of Head and Neck Cancer Cases and Controls Restricted to U.S. Whites and Blacks in INHANCE, 1981-2007

| Characteristic                  | No. Cases<br>(n=7574) | %    | No. Controls<br>(n=7073) | %    |
|---------------------------------|-----------------------|------|--------------------------|------|
| Sex                             |                       |      |                          |      |
| Female                          | 2133                  | 28.2 | 3143                     | 33.1 |
| Male                            | 5441                  | 71.8 | 6343                     | 66.9 |
| Race                            |                       |      |                          |      |
| Black                           | 975                   | 12.9 | 953                      | 10.1 |
| White                           | 6599                  | 87.1 | 8533                     | 90.0 |
| Age                             |                       |      |                          |      |
| 17-39                           | 319                   | 4.2  | 563                      | 5.9  |
| 40-44                           | 376                   | 5.0  | 519                      | 5.5  |
| 45-49                           | 745                   | 9.8  | 871                      | 9.2  |
| 50-54                           | 1110                  | 14.7 | 1387                     | 14.6 |
| 55-59                           | 1384                  | 18.3 | 1677                     | 17.7 |
| 60-64                           | 1315                  | 17.4 | 1519                     | 16.0 |
| 65-69                           | 1065                  | 14.1 | 1366                     | 14.4 |
| 70-74                           | 758                   | 10.0 | 960                      | 10.1 |
| 75+                             | 502                   | 6.6  | 624                      | 6.6  |
| Education Level                 |                       |      |                          |      |
| Less than junior high school    | 504                   | 6.7  | 372                      | 3.9  |
| Some high school                | 1595                  | 21.1 | 1172                     | 12.4 |
| High school graduate            | 1390                  | 25.5 | 1981                     | 20.9 |
| Vocational school, some college | 2200                  | 29.1 | 3211                     | 33.9 |
| College graduate/postgraduate   | 1345                  | 17.8 | 2750                     | 29.0 |
| Study Center                    |                       |      |                          |      |
| Baltimore                       | 202                   | 2.7  | 187                      | 2.0  |
| Boston                          | 470                   | 6.2  | 595                      | 6.3  |
| Houston                         | 758                   | 10.0 | 784                      | 8.3  |
| Iowa                            | 526                   | 6.9  | 737                      | 7.8  |
| Los Angeles                     | 313                   | 4.1  | 733                      | 7.7  |
| MSKCC                           | 101                   | 1.3  | 145                      | 1.5  |
| New York Multicenter            | 1433                  | 18.9 | 1604                     | 16.9 |
| North Carolina (1994-1997)      | 175                   | 2.3  | 200                      | 2.1  |
| North Carolina (2002-2006)      | 1303                  | 17.2 | 1357                     | 14.3 |
| Seattle (1985-1995)             | 402                   | 5.3  | 596                      | 6.3  |
| Seattle-Leo                     | 634                   | 8.4  | 535                      | 5.6  |
| Tampa                           | 197                   | 2.6  | 836                      | 8.8  |
| US Multicenter                  | 1060                  | 14.0 | 1177                     | 12.4 |
| Tumor Site                      |                       |      |                          |      |
| Head and Neck (NOS)             | 6                     | 0.1  |                          |      |
| Hypopharynx                     | 424                   | 5.6  |                          |      |
| Larynx                          | 1509                  | 19.9 |                          |      |
| Oral Cavity                     | 2248                  | 29.7 |                          |      |
| Oral/Pharynx (NOS)              | 806                   | 10.6 |                          |      |
| Oro-pharynx                     | 2581                  | 34.0 |                          |      |

**Supplemental Table 2.** Smoking Characteristics and Associations with Head and Neck Cancer Risk by Race and Anatomic Site, INHANCE Consortium, 1981-2007

| Cigarette Use Characteristic    | Controls |       | Hypopharynx |                          |                 |             |                          |                 | Larynx      |                          |                 |             |                          |                 | Oral Cavity |                          |                 |             |                          |                 |
|---------------------------------|----------|-------|-------------|--------------------------|-----------------|-------------|--------------------------|-----------------|-------------|--------------------------|-----------------|-------------|--------------------------|-----------------|-------------|--------------------------|-----------------|-------------|--------------------------|-----------------|
|                                 | White    | Black | White Cases | Adjusted OR <sup>a</sup> | Adjusted 95% CI | Black Cases | Adjusted OR <sup>a</sup> | Adjusted 95% CI | White Cases | Adjusted OR <sup>a</sup> | Adjusted 95% CI | Black Cases | Adjusted OR <sup>a</sup> | Adjusted 95% CI | White Cases | Adjusted OR <sup>a</sup> | Adjusted 95% CI | Black Cases | Adjusted OR <sup>a</sup> | Adjusted 95% CI |
| Cigarette Smoking               |          |       |             |                          |                 |             |                          |                 |             |                          |                 |             |                          |                 |             |                          |                 |             |                          |                 |
| Never                           | 3308     | 372   | 30          | 1                        |                 | 13          | 1                        |                 | 74          | 1                        |                 | 12          | 1                        |                 | 408         | 1                        |                 | 28          | 1                        |                 |
| Ever                            | 5224     | 581   | 303         | 3.07                     | 2.07-4.55       | 78          | 1.11                     | 0.54-2.28       | 1195        | 6.55                     | 5.10-8.41       | 227         | 7.48                     | 3.72-15.03      | 1608        | 1.60                     | 1.41-1.82       | 202         | 2.01                     | 1.24-3.26       |
| Missing                         | 1        |       |             |                          |                 |             |                          |                 | 1           |                          |                 |             |                          |                 |             |                          |                 | 2           |                          |                 |
| Cigarette Smoking Status        |          |       |             |                          |                 |             |                          |                 |             |                          |                 |             |                          |                 |             |                          |                 |             |                          |                 |
| Never                           | 3308     | 372   | 30          | 1                        |                 | 13          | 1                        |                 | 74          | 1                        |                 | 12          | 1                        |                 | 408         | 1                        |                 | 28          | 1                        |                 |
| Former                          | 3358     | 281   | 88          | 1.53                     | 0.98-2.38       | 15          | 0.39                     | 0.15-1.03       | 345         | 2.82                     | 2.15-3.71       | 54          | 3.14                     | 1.42-6.95       | 458         | 0.92                     | 0.78-1.07       | 30          | 0.74                     | 0.38-1.42       |
| Current                         | 1866     | 300   | 215         | 10.01                    | 6.47-15.49      | 63          | 1.69                     | 1.51-7.11       | 850         | 14.69                    | 11.26-19.15     | 173         | 13.05                    | 6.22-27.35      | 1149        | 3.13                     | 2.71-3.62       | 172         | 3.39                     | 2.03-5.68       |
| Missing                         | 1        |       |             |                          |                 |             |                          |                 | 1           |                          |                 |             |                          |                 | 1           |                          |                 | 2           |                          |                 |
| Smoking Frequency <sup>b</sup>  |          |       |             |                          |                 |             |                          |                 |             |                          |                 |             |                          |                 |             |                          |                 |             |                          |                 |
| Never                           | 3308     | 372   | 30          | 1                        |                 | 13          | 1                        |                 | 74          | 1                        |                 | 12          | 1                        |                 | 408         | 1                        |                 | 28          | 1                        |                 |
| 1-10                            | 1121     | 251   | 17          | 0.97                     | 0.51-1.86       | 20          | 0.79                     | 0.33-1.87       | 60          | 1.86                     | 1.29-2.69       | 47          | 3.62                     | 1.63-8.05       | 152         | 0.98                     | 0.80-1.21       | 44          | 1.38                     | 0.77-2.48       |
| 11-20                           | 2039     | 220   | 94          | 2.87                     | 1.83-4.51       | 36          | 1.23                     | 0.53-2.83       | 371         | 5.50                     | 4.18-7.24       | 91          | 8.52                     | 3.89-18.66      | 557         | 1.70                     | 1.45-1.99       | 88          | 2.39                     | 1.35-4.23       |
| 21-30                           | 857      | 53    | 68          | 5.08                     | 3.10-8.34       | 9           | 2.79                     | 0.94-8.23       | 295         | 9.51                     | 7.07-12.80      | 38          | 22.70                    | 8.90-57.94      | 364         | 2.55                     | 2.12-3.08       | 28          | 3.37                     | 1.52-7.47       |
| >30                             | 1197     | 52    | 122         | 4.48                     | 2.83-7.11       | 11          | 1.03                     | 0.33-3.16       | 463         | 11.27                    | 8.47-15.01      | 50          | 16.30                    | 5.62-47.29      | 530         | 2.30                     | 1.93-2.76       | 41          | 3.35                     | 1.56-7.20       |
| Missing                         | 11       | 5     | 2           |                          |                 | 2           |                          |                 | 7           |                          |                 | 1           |                          |                 | 5           |                          |                 | 3           |                          |                 |
| Smoking Duration <sup>c</sup>   |          |       |             |                          |                 |             |                          |                 |             |                          |                 |             |                          |                 |             |                          |                 |             |                          |                 |
| Never                           | 3291     | 372   | 29          | 1                        |                 | 13          | 1                        |                 | 71          | 1                        |                 | 11          | 1                        |                 | 404         | 1                        |                 | 26          | 1                        |                 |
| 1-10                            | 819      | 81    | 11          | 1.27                     | 0.61-2.67       | 2           | 0.15                     | 0.03-2.22       | 31          | 1.58                     | 1.00-2.48       | 0           | n/a                      |                 | 68          | 0.69                     | 0.52-0.91       | 4           | 0.65                     | 0.20-2.08       |
| 11-20                           | 970      | 99    | 15          | 1.32                     | 0.67-2.58       | 2           | 0.26                     | 0.05-1.37       | 71          | 2.49                     | 1.73-3.57       | 15          | 4.67                     | 1.72-12.67      | 120         | 1.00                     | 0.79-1.26       | 10          | 1.00                     | 0.41-2.43       |
| 21-30                           | 1209     | 148   | 40          | 2.05                     | 1.20-3.51       | 20          | 1.15                     | 0.46-2.89       | 171         | 4.35                     | 3.18-5.95       | 45          | 6.41                     | 2.64-15.54      | 292         | 1.52                     | 1.27-1.83       | 36          | 1.69                     | 0.85-3.34       |
| >30                             | 2228     | 249   | 237         | 5.13                     | 3.37-7.80       | 49          | 1.23                     | 0.55-2.77       | 920         | 12.62                    | 9.64-16.53      | 167         | 14.49                    | 6.74-31.19      | 1125        | 2.61                     | 2.25-3.03       | 153         | 3.85                     | 2.22-6.70       |
| Missing                         | 16       | 4     | 1           |                          |                 | 5           |                          |                 | 6           |                          |                 | 1           |                          |                 | 7           |                          |                 | 3           |                          |                 |
| Cumulative Smoking <sup>d</sup> |          |       |             |                          |                 |             |                          |                 |             |                          |                 |             |                          |                 |             |                          |                 |             |                          |                 |
| Never                           | 3308     | 372   | 30          | 1                        |                 | 13          | 1                        |                 | 74          | 1                        |                 | 12          | 1                        |                 | 408         | 1                        |                 | 28          | 1                        |                 |
| 1-10                            | 1181     | 179   | 15          | 1.10                     | 0.58-2.11       | 9           | 0.46                     | 0.15-1.40       | 47          | 1.58                     | 1.08-2.33       | 20          | 2.11                     | 0.85-5.28       | 113         | 0.76                     | 0.60-0.95       | 17          | 1.03                     | 0.50-2.11       |

|         |      |     |     |      |           |    |      |           |     |       |            |     |       |            |      |      |           |     |      |           |
|---------|------|-----|-----|------|-----------|----|------|-----------|-----|-------|------------|-----|-------|------------|------|------|-----------|-----|------|-----------|
| 11-20   | 792  | 129 | 14  | 1.45 | 0.73-2.85 | 11 | 1.00 | 0.37-2.68 | 72  | 2.99  | 2.02-4.17  | 35  | 5.55  | 2.34-13.18 | 115  | 1.11 | 0.88-1.41 | 21  | 0.96 | 0.45-2.04 |
| 21-30   | 779  | 92  | 21  | 1.46 | 0.77-2.75 | 12 | 0.70 | 0.23-2.09 | 87  | 3.33  | 2.33-4.76  | 21  | 6.94  | 2.63-18.32 | 180  | 1.64 | 1.33-2.03 | 36  | 2.43 | 1.22-4.83 |
| >30     | 2453 | 176 | 250 | 4.99 | 3.32-7.52 | 40 | 1.67 | 0.70-4.00 | 983 | 12.07 | 9.30-15.67 | 149 | 17.93 | 8.23-39.09 | 1191 | 2.49 | 2.15-2.88 | 126 | 4.37 | 2.44-7.82 |
| Missing | 20   | 5   | 3   |      |           | 6  |      |           | 7   |       |            | 2   |       |            | 9    |      |           | 4   |      |           |

| Cigarette Use Characteristic    | Oral/Pharynx (NOS) |                          |                 |             |                          |                 | Oro-pharynx |                          |                 |             |                          |                 |
|---------------------------------|--------------------|--------------------------|-----------------|-------------|--------------------------|-----------------|-------------|--------------------------|-----------------|-------------|--------------------------|-----------------|
|                                 | White Cases        | Adjusted OR <sup>a</sup> | Adjusted 95% CI | Black Cases | Adjusted OR <sup>a</sup> | Adjusted 95% CI | White Cases | Adjusted OR <sup>a</sup> | Adjusted 95% CI | Black Cases | Adjusted OR <sup>a</sup> | Adjusted 95% CI |
| Cigarette Smoking               |                    |                          |                 |             |                          |                 |             |                          |                 |             |                          |                 |
| Never                           | 183                | 1                        |                 | 16          | 1                        |                 | 508         | 1                        |                 | 24          | 1                        |                 |
| Ever                            | 505                | 1.23                     | 1.02-1.48       | 102         | 1.68                     | 0.91-3.12       | 1778        | 1.49                     | 1.32-1.68       | 271         | 2.70                     | 1.66-4.39       |
| Missing                         |                    |                          |                 |             |                          |                 |             |                          |                 |             |                          |                 |
| Cigarette Smoking Status        |                    |                          |                 |             |                          |                 |             |                          |                 |             |                          |                 |
| Never                           | 183                | 1                        |                 | 16          | 1                        |                 | 508         | 1                        |                 | 24          | 1                        |                 |
| Former                          | 171                | 0.76                     | 0.60-0.96       | 23          | 1.03                     | 0.47-2.25       | 677         | 1.05                     | 0.92-1.21       | 51          | 1.54                     | 0.85-2.81       |
| Current                         | 334                | 2.32                     | 1.87-2.87       | 79          | 2.42                     | 1.25-4.68       | 1101        | 2.48                     | 2.16-2.84       | 220         | 3.85                     | 2.30-6.43       |
| Missing                         |                    |                          |                 |             |                          |                 |             |                          |                 |             |                          |                 |
| Smoking Frequency <sup>b</sup>  |                    |                          |                 |             |                          |                 |             |                          |                 |             |                          |                 |
| Never                           | 183                | 1                        |                 | 16          | 1                        |                 | 508         | 1                        |                 | 24          | 1                        |                 |
| 1-10                            | 59                 | 0.84                     | 0.61-1.15       | 22          | 0.97                     | 0.45-2.10       | 205         | 1.12                     | 0.93-1.35       | 65          | 1.85                     | 1.06-3.24       |
| 11-20                           | 165                | 1.20                     | 0.95-1.52       | 49          | 2.28                     | 1.10-4.72       | 627         | 1.51                     | 1.31-1.74       | 102         | 2.72                     | 1.54-4.84       |
| 21-30                           | 94                 | 1.64                     | 1.22-2.20       | 13          | 2.44                     | 0.87-6.85       | 357         | 1.87                     | 1.56-2.23       | 49          | 5.83                     | 2.82-12.03      |
| >30                             | 181                | 1.94                     | 1.50-2.50       | 17          | 4.39                     | 1.62-11.93      | 583         | 1.97                     | 1.68-2.32       | 54          | 7.23                     | 3.57-14.61      |
| Missing                         | 6                  |                          |                 | 1           |                          |                 | 6           |                          |                 | 1           |                          |                 |
| Smoking Duration <sup>c</sup>   |                    |                          |                 |             |                          |                 |             |                          |                 |             |                          |                 |
| Never                           | 183                | 1                        |                 | 16          | 1                        |                 | 500         | 1                        |                 | 21          | 1                        |                 |
| 1-10                            | 30                 | 0.62                     | 0.41-0.94       | 6           | 1.40                     | 0.49-4.01       | 164         | 1.10                     | 0.90-1.35       | 4           | 0.65                     | 0.20-2.07       |
| 11-20                           | 42                 | 0.75                     | 0.52-1.07       | 6           | 0.95                     | 0.32-2.86       | 160         | 0.86                     | 0.70-1.05       | 14          | 1.52                     | 0.68-3.40       |
| 21-30                           | 67                 | 0.86                     | 0.63-1.17       | 20          | 1.63                     | 0.70-3.79       | 328         | 1.33                     | 1.12-1.58       | 75          | 3.34                     | 1.78-6.28       |
| >30                             | 362                | 1.97                     | 1.58-2.44       | 69          | 2.41                     | 1.19-4.88       | 1125        | 2.36                     | 2.05-2.73       | 174         | 5.79                     | 3.22-10.44      |
| Missing                         | 4                  |                          |                 | 1           |                          |                 | 9           |                          |                 | 7           |                          |                 |
| Cumulative Smoking <sup>d</sup> |                    |                          |                 |             |                          |                 |             |                          |                 |             |                          |                 |

|         |     |      |           |    |      |           |      |      |           |     |      |            |
|---------|-----|------|-----------|----|------|-----------|------|------|-----------|-----|------|------------|
| Never   | 183 | 1    |           | 16 | 1    |           | 508  | 1    |           | 24  | 1    |            |
| 1-10    | 41  | 0.59 | 0.42-0.85 | 14 | 1.07 | 0.46-2.51 | 214  | 1.04 | 0.87-1.24 | 26  | 1.37 | 0.71-2.62  |
| 11-20   | 41  | 0.85 | 0.59-1.23 | 13 | 1.30 | 0.53-3.21 | 156  | 1.09 | 0.89-1.34 | 32  | 1.50 | 0.75-3.00  |
| 21-30   | 43  | 0.88 | 0.61-1.26 | 18 | 2.68 | 1.10-6.56 | 192  | 1.23 | 1.00-1.50 | 48  | 3.46 | 1.78-6.73  |
| >30     | 373 | 1.94 | 1.57-2.39 | 56 | 2.99 | 1.40-6.36 | 1204 | 2.13 | 1.86-2.45 | 158 | 6.79 | 3.75-12.29 |
| Missing | 7   |      |           | 1  |      |           | 12   |      |           | 7   |      |            |

<sup>a</sup> Odds ratios adjusted for age, sex, study center, educational level (with imputation for missing values), frequency of alcohol use (mL of ethanol per day, categorical), duration of cigar smoking (years, continuous), duration of pipe smoking (years, continuous), ever use of snuff, and ever use of chew.

<sup>b</sup> in cigarettes/day

<sup>c</sup> in years

<sup>d</sup> in pack-years

**Supplemental Table 3.** Alcohol Characteristics and Associations with Head and Neck Cancer Risk by Race and Anatomic Site, INHANCE Consortium, 1981-2007

| Alcohol Use Characteristic        | Controls    |       |             | Hypopharynx              |                 |             |                          |                 | Larynx      |                          |                 |             |                          | Oral Cavity     |             |                          |             |             |                          |             |
|-----------------------------------|-------------|-------|-------------|--------------------------|-----------------|-------------|--------------------------|-----------------|-------------|--------------------------|-----------------|-------------|--------------------------|-----------------|-------------|--------------------------|-------------|-------------|--------------------------|-------------|
|                                   | White Cases | Black | White Cases | Adjusted OR <sup>a</sup> | Adjusted 95% CI | Black Cases | Adjusted OR <sup>a</sup> | Adjusted 95% CI | White Cases | Adjusted OR <sup>a</sup> | Adjusted 95% CI | Black Cases | Adjusted OR <sup>a</sup> | Adjusted 95% CI | White Cases | Adjusted OR <sup>a</sup> | Adjusted CI | Black Cases | Adjusted OR <sup>a</sup> | Adjusted CI |
| Number of Drinks/Day <sup>b</sup> |             |       |             |                          |                 |             |                          |                 |             |                          |                 |             |                          |                 |             |                          |             |             |                          |             |
| Never to <1                       | 5850        | 641   | 92          | 1                        |                 | 14          | 1                        |                 | 514         | 1                        |                 | 67          | 1                        |                 | 842         | 1                        |             | 63          | 1                        |             |
| ≥1 to <3                          | 1427        | 155   | 74          | 3.33                     | 2.37-4.67       | 22          | 5.84                     | 2.55-13.40      | 233         | 1.32                     | 1.08-1.60       | 47          | 1.71                     | 1.00-2.94       | 424         | 2.05                     | 1.78-2.37   | 45          | 2.67                     | 1.64-4.35   |
| ≥3 to <5                          | 433         | 51    | 42          | 5.66                     | 3.66-8.77       | 10          | 10.91                    | 3.51-33.93      | 135         | 2.13                     | 1.64-2.76       | 25          | 1.41                     | 0.66-3.02       | 228         | 3.52                     | 2.89-4.28   | 28          | 3.31                     | 1.74-6.31   |
| ≥5                                | 553         | 84    | 105         | 11.70                    | 8.04-17.02      | 35          | 17.61                    | 7.37-42.05      | 329         | 3.16                     | 2.56-3.91       | 92          | 2.57                     | 1.51-4.37       | 438         | 5.05                     | 4.25-6.00   | 80          | 5.47                     | 3.36-8.93   |
| Missing                           | 10          | 2     |             |                          |                 | 1           |                          |                 | 3           |                          |                 | 1           |                          |                 |             |                          | 1           |             |                          |             |
| Amount per Day <sup>c</sup>       |             |       |             |                          |                 |             |                          |                 |             |                          |                 |             |                          |                 |             |                          |             |             |                          |             |
| Never to ≤8                       | 4681        | 540   | 60          | 1                        |                 | 9           | 1                        |                 | 391         | 1                        |                 | 47          | 1                        |                 | 624         | 1                        |             | 45          | 1                        |             |
| >8 to ≤18                         | 1395        | 121   | 37          | 1.91                     | 1.23-2.96       | 9           | 3.80                     | 1.33-10.87      | 148         | 1.21                     | 0.97-1.53       | 25          | 2.71                     | 1.39-5.27       | 270         | 1.60                     | 1.36-1.88   | 23          | 1.84                     | 0.99-3.43   |
| >18 to ≤40                        | 1078        | 120   | 63          | 4.24                     | 2.74-6.56       | 12          | 4.59                     | 1.55-13.57      | 181         | 1.43                     | 1.14-1.80       | 35          | 2.30                     | 1.21-4.38       | 316         | 2.31                     | 1.95-2.73   | 29          | 2.95                     | 1.60-5.44   |
| >40-≤75                           | 535         | 63    | 47          | 6.68                     | 4.22-10.55      | 14          | 14.48                    | 4.71-44.50      | 154         | 2.08                     | 1.61-2.69       | 29          | 2.17                     | 1.01-4.66       | 270         | 3.88                     | 3.20-4.71   | 34          | 5.02                     | 2.55-9.88   |
| >75                               | 574         | 87    | 106         | 14.09                    | 9.24-21.51      | 37          | 20.94                    | 7.92-55.38      | 337         | 3.22                     | 2.57-4.02       | 95          | 3.43                     | 1.93-6.11       | 452         | 5.77                     | 4.79-6.95   | 85          | 7.51                     | 4.32-3.03   |
| Missing                           | 10          | 2     |             |                          |                 | 1           |                          |                 | 3           |                          |                 | 1           |                          |                 |             |                          | 1           |             |                          |             |
| Alcohol Duration <sup>d</sup>     |             |       |             |                          |                 |             |                          |                 |             |                          |                 |             |                          |                 |             |                          |             |             |                          |             |
| Never to <20                      | 3030        | 379   | 48          | 1                        |                 | 5           | 1                        |                 | 261         | 1                        |                 | 33          | 1                        |                 | 496         | 1                        |             | 41          | 1                        |             |
| ≥20 to <30                        | 979         | 96    | 30          | 2.14                     | 1.32-3.49       | 12          | 9.87                     | 2.89-33.75      | 142         | 1.60                     | 1.24-2.07       | 28          | 3.05                     | 1.47-6.33       | 274         | 1.62                     | 1.36-1.94   | 29          | 2.01                     | 1.07-3.79   |
| ≥30                               | 3579        | 310   | 165         | 2.52                     | 1.77-3.59       | 44          | 10.18                    | 3.52-29.46      | 853         | 1.69                     | 1.41-2.02       | 177         | 2.61                     | 1.54-4.42       | 922         | 1.38                     | 1.20-1.58   | 106         | 2.20                     | 1.38-3.50   |
| Missing                           | 911         | 165   | 82          |                          |                 | 25          |                          |                 | 5           |                          |                 |             |                          |                 |             |                          | 54          |             |                          |             |

| Alcohol Use Characteristic        | Oral/Pharynx (NOS) |                          |                 |             |                          |                 | Oro-pharynx |                          |                 |             |                          |                 |
|-----------------------------------|--------------------|--------------------------|-----------------|-------------|--------------------------|-----------------|-------------|--------------------------|-----------------|-------------|--------------------------|-----------------|
|                                   | White Cases        | Adjusted OR <sup>a</sup> | Adjusted 95% CI | Black Cases | Adjusted OR <sup>a</sup> | Adjusted 95% CI | White Cases | Adjusted OR <sup>a</sup> | Adjusted 95% CI | Black Cases | Adjusted OR <sup>a</sup> | Adjusted 95% CI |
| Number of Drinks/Day <sup>b</sup> |                    |                          |                 |             |                          |                 |             |                          |                 |             |                          |                 |
| Never to <1                       | 307                | 1                        |                 | 32          | 1                        |                 | 672         | 1                        |                 | 60          | 1                        |                 |
| ≥1 to <3                          | 160                | 2.11                     | 1.70-2.61       | 20          | 2.11                     | 1.05-4.22       | 500         | 1.77                     | 1.56-2.02       | 69          | 3.42                     | 2.17-5.37       |
| ≥3 to <5                          | 83                 | 3.50                     | 2.63-4.66       | 19          | 4.49                     | 2.06-9.81       | 267         | 2.81                     | 2.35-3.36       | 35          | 3.80                     | 2.11-6.86       |

|                               |     |      |           |    |      |            |      |      |           |     |      |            |
|-------------------------------|-----|------|-----------|----|------|------------|------|------|-----------|-----|------|------------|
| ≥5                            | 120 | 3.47 | 2.65-4.56 | 43 | 6.59 | 3.55-12.21 | 433  | 3.27 | 2.78-3.84 | 118 | 8.39 | 5.33-13.22 |
| Missing                       | 3   |      |           |    |      |            | 2    |      |           |     |      |            |
| Amount per Day <sup>c</sup>   |     |      |           | 12 |      |            |      |      |           |     |      |            |
| Never to ≤8                   | 236 | 1    |           | 23 | 1    |            | 694  | 1    |           | 45  | 1    |            |
| >8 to ≤18                     | 93  | 1.45 | 1.12-1.87 | 11 | 1.81 | 0.79-4.31  | 339  | 1.50 | 1.29-1.74 | 23  | 1.86 | 1.02-3.38  |
| >18 to ≤40                    | 119 | 2.26 | 1.76-2.91 | 16 | 2.98 | 1.33-6.66  | 382  | 1.99 | 1.71-2.31 | 49  | 2.30 | 1.90-5.72  |
| >40-≤75                       | 98  | 3.70 | 2.79-4.90 | 19 | 6.02 | 2.57-14.10 | 306  | 2.93 | 2.46-3.49 | 45  | 5.16 | 2.82-9.45  |
| >75                           | 124 | 3.69 | 2.77-4.92 | 45 | 8.53 | 4.25-17.11 | 451  | 3.69 | 3.12-4.37 | 120 | 9.50 | 5.75-15.70 |
| Missing                       | 3   |      |           |    |      |            | 2    |      |           |     |      |            |
| Alcohol Duration <sup>c</sup> |     |      |           |    |      |            |      |      |           |     |      |            |
| Never to <20                  | 153 | 1    |           | 12 | 1    |            | 501  | 1    |           | 30  | 1    |            |
| ≥20 to <30                    | 57  | 1.20 | 0.87-1.65 | 15 | 4.61 | 1.86-11.41 | 350  | 1.83 | 1.56-2.16 | 42  | 4.12 | 2.33-7.27  |
| ≥30                           | 305 | 1.85 | 1.48-2.32 | 59 | 5.79 | 2.81-11.95 | 1127 | 1.81 | 1.59-2.06 | 148 | 4.60 | 2.79-7.59  |
| Missing                       | 166 |      |           | 30 |      |            | 285  |      |           | 72  |      |            |

<sup>a</sup> Odds ratios adjusted for age, sex, study center, educational level, pack-years of smoking, duration of cigar smoking (years), duration of pipe smoking (years), ever snuff use, and ever chew use.

<sup>b</sup> Drinking status with 15.6 mL of ethanol in lifetime

<sup>c</sup> in mL

<sup>d</sup> in years
